# Supplementary material
Source: publisher figshare collection journal article supplement (https://sage.figshare.com/ndownloader/files/14605865)
Supplement: Supplementary file 1 [file 14605865]

# Online Appendix

to the paper

## Enigmas of Inequality Grievances: Effects of attitudes toward inequality and government redistribution on protest participation

This document presents the results of robustness checks that could not be included in the text due to space constraints. One might question the inclusion of petition in the measurement of protest, because “signing a petition” is not only a part of longstanding democratic practices but also an accepted communication channel that empowers citizens (Dalton et al., 2009: 12; Stewart et al., 2013). Hence, in Models 8-11 in Table A1, we repeat the analysis using an alternative measure of protest that exclude ‘petitions’ category and ranges from 0 to 4. Similarly, the inclusion of “any other act of protest” might be questioned because the meaning of protest action can be different across different socio-cultural contexts. Models 12-15 in Table A2 report the results of analysis using an index of protest activity that excludes ‘any other act’ category. These changes make no substantive difference for our main findings, except that *Hard Work* becomes statistically significant for OECD countries in Models 10 and 11.

Table A1: Index of protest activity excluding ‘signing a petition’

| VARIABLES                         | <i>Full Sample</i>   |                      | <i>OECD Countries only</i> |                      |
|-----------------------------------|----------------------|----------------------|----------------------------|----------------------|
|                                   | (8)                  | (9)                  | (10)                       | (11)                 |
| <i>Individual-level Variables</i> |                      |                      |                            |                      |
| Inequality Perception             | 0.005<br>(0.003)*    | -0.013<br>(0.006)**  | 0.017<br>(0.004)***        | -0.022<br>(0.008)*** |
| Inequality Per. × Income          |                      | -0.001<br>(0.001)    |                            | -0.001<br>(0.002)    |
| Inequality Per. × Education       |                      | 0.004<br>(0.001)***  |                            | 0.008<br>(0.002)***  |
| Inequality Per. × Labor Union     |                      | 0.011<br>(0.006)*    |                            | 0.032<br>(0.008)***  |
| Government Subsidy                | 0.008<br>(0.002)***  | 0.008<br>(0.002)***  | 0.017<br>(0.004)***        | 0.010<br>(0.003)***  |
| Hard Work                         | 0.007<br>(0.003)***  | 0.006<br>(0.002)***  | 0.017<br>(0.004)***        | 0.008<br>(0.005)*    |
| Income                            | 0.007<br>(0.004)     | 0.011<br>(0.007)*    | 0.017<br>(0.004)***        | 0.003<br>(0.009)     |
| Education                         | 0.037<br>(0.005)***  | 0.017<br>(0.006)***  | 0.017<br>(0.004)***        | 0.011<br>(0.009)     |
| Labor Union                       | 0.260<br>(0.029)***  | 0.210<br>(0.038)***  | 0.017<br>(0.004)***        | 0.191<br>(0.066)***  |
| Trust in Government               | 0.021<br>(0.011)*    | 0.021<br>(0.011)*    | 0.017<br>(0.004)***        | 0.063<br>(0.014)***  |
| Interest in Politics              | 0.136<br>(0.013)***  | 0.136<br>(0.013)***  | 0.017<br>(0.004)***        | 0.171<br>(0.020)***  |
| Ideology                          | 0.022<br>(0.005)***  | 0.021<br>(0.005)***  | 0.017<br>(0.004)***        | 0.048<br>(0.009)***  |
| Election                          | 0.041<br>(0.012)***  | 0.041<br>(0.012)***  | 0.017<br>(0.004)***        | 0.056<br>(0.022)**   |
| Age                               | 0.001<br>(0.000)**   | 0.001<br>(0.000)**   | 0.017<br>(0.004)***        | 0.001<br>(0.001)     |
| Female                            | -0.073<br>(0.019)*** | -0.073<br>(0.019)*** | 0.017<br>(0.004)***        | -0.021<br>(0.016)    |
| <i>Country-level Variables</i>    |                      |                      |                            |                      |
| Democracy                         | 0.006<br>(0.006)     | 0.006<br>(0.006)     | 0.048<br>(0.054)           | 0.048<br>(0.055)     |
| Gini Coefficient                  | 0.001<br>(0.004)     | 0.001<br>(0.004)     | 0.004<br>(0.008)           | 0.005<br>(0.008)     |
| Social Spending                   | 0.003<br>(0.005)     | 0.003<br>(0.005)     | 0.002<br>(0.010)           | 0.002<br>(0.010)     |
| Left Government                   | 0.190<br>(0.060)***  | 0.190<br>(0.060)***  | 0.125<br>(0.141)           | 0.127<br>(0.139)     |
| Constant                          | -0.504<br>(0.171)*** | -0.414<br>(0.171)**  | -1.417<br>(0.637)**        | -1.199<br>(0.644)*   |
| S.D. of Random Effects            | 0.178                | 0.179                | 0.177                      | 0.177                |
| Observations                      | 55,003               | 55,003               | 17,208                     | 17,208               |
| Number of countries               | 45                   | 45                   | 15                         | 15                   |

Note: Robust standard errors in parenthesis; \*  $p < .1$ ; \*\*  $p < .05$ ; \*\*\*  $p < .01$  (two-tailed tests)

Table A2: Index of protest activity excluding ‘any other act of protest’

| VARIABLES                         | <i>Full Sample</i>   |                      | <i>OECD Countries only</i> |                     |
|-----------------------------------|----------------------|----------------------|----------------------------|---------------------|
|                                   | (12)                 | (13)                 | (14)                       | (15)                |
| <i>Individual-level Variables</i> |                      |                      |                            |                     |
| Inequality Perception             | 0.005<br>(0.003)*    | -0.016<br>(0.005)*** | 0.017<br>(0.005)***        | -0.019<br>(0.009)** |
| Inequality Per. × Income          |                      | -0.001<br>(0.001)    |                            | -0.001<br>(0.002)   |
| Inequality Per. × Education       |                      | 0.005<br>(0.001)***  |                            | 0.007<br>(0.002)*** |
| Inequality Per. × Labor Union     |                      | 0.012<br>(0.006)*    |                            | 0.032<br>(0.008)*** |
| Government Subsidy                | 0.009<br>(0.002)***  | 0.009<br>(0.002)***  | 0.014<br>(0.004)***        | 0.013<br>(0.004)*** |
| Hard Work                         | 0.004<br>(0.002)*    | 0.004<br>(0.002)*    | 0.008<br>(0.006)           | 0.007<br>(0.006)    |
| Income                            | 0.009<br>(0.004)**   | 0.012<br>(0.007)*    | 0.000<br>(0.005)           | 0.005<br>(0.008)    |
| Education                         | 0.053<br>(0.006)***  | 0.031<br>(0.006)***  | 0.076<br>(0.008)***        | 0.041<br>(0.008)*** |
| Labor Union                       | 0.277<br>(0.032)***  | 0.219<br>(0.043)***  | 0.382<br>(0.041)***        | 0.217<br>(0.067)*** |
| Trust in Government               | 0.022<br>(0.014)     | 0.022<br>(0.013)     | 0.072<br>(0.017)***        | 0.072<br>(0.017)*** |
| Interest in Politics              | 0.166<br>(0.015)***  | 0.165<br>(0.015)***  | 0.215<br>(0.023)***        | 0.213<br>(0.023)*** |
| Ideology                          | 0.025<br>(0.005)***  | 0.024<br>(0.005)***  | 0.054<br>(0.012)***        | 0.051<br>(0.011)*** |
| Election                          | 0.076<br>(0.021)***  | 0.076<br>(0.021)***  | 0.163<br>(0.034)***        | 0.163<br>(0.035)*** |
| Age                               | 0.002<br>(0.001)***  | 0.002<br>(0.001)***  | 0.001<br>(0.001)           | 0.001<br>(0.001)    |
| Female                            | -0.044<br>(0.019)**  | -0.044<br>(0.019)**  | 0.031<br>(0.017)*          | 0.031<br>(0.017)*   |
| <i>Country-level Variables</i>    |                      |                      |                            |                     |
| Democracy                         | 0.015<br>(0.007)**   | 0.014<br>(0.007)**   | 0.119<br>(0.071)*          | 0.120<br>(0.071)*   |
| Gini Coefficient                  | 0.001<br>(0.005)     | 0.001<br>(0.005)     | 0.001<br>(0.013)           | 0.001<br>(0.013)    |
| Social Spending                   | 0.015<br>(0.007)**   | 0.015<br>(0.007)**   | 0.007<br>(0.018)           | 0.007<br>(0.018)    |
| Left Government                   | 0.267<br>(0.082)***  | 0.267<br>(0.082)***  | 0.158<br>(0.198)           | 0.160<br>(0.197)    |
| Constant                          | -0.751<br>(0.240)*** | -0.649<br>(0.239)*** | -2.088<br>(0.914)**        | -1.887<br>(0.923)** |
| S.D. of Random Effects            | 0.241                | 0.241                | 0.264                      | 0.263               |
| Observations                      | 55,003               | 55,003               | 17,208                     | 17,208              |
| Number of countries               | 45                   | 45                   | 15                         | 15                  |

Note: Robust standard errors in parenthesis; \*  $p < .1$ ; \*\*  $p < .05$ ; \*\*\*  $p < .01$  (two-tailed tests)
